# Supplementary material
Source: Springer Nature journal article supplement (https://www.springermedizin.de/resource/supplementary/12936_2011_1844_MOESM2_ESM.pdf/9541844)

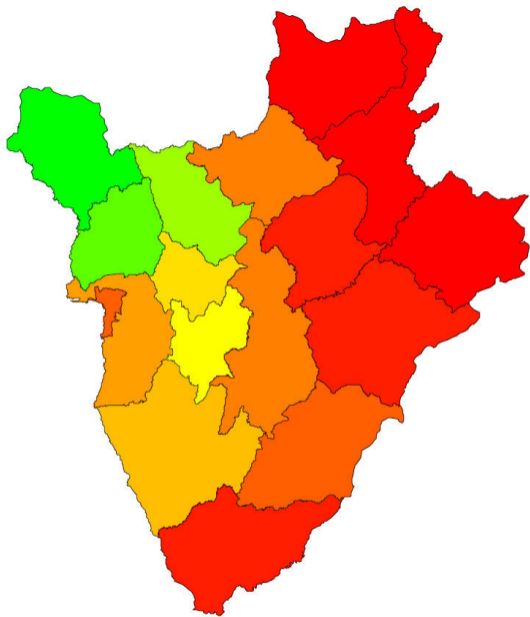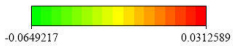

Supplement: MOESM2 [file 9541844]
